# Supplementary material for: The kynurenine:tryptophan ratio as a predictor of incident type 2 diabetes mellitus in individuals with coronary artery disease
Source: Springer Nature journal article supplement (doi:10.1007/s00125-017-4329-9), 2017-06-13
Supplement: MOESM1 [file 12441362]

**ESM Table 1** Baseline characteristics of the total study population ( $n=4164$ ) according to diabetes mellitus at study enrolment

| Variable                                          | Valid $n$ | Total population<br>$n=4164$ | Diabetes mellitus |                                   |                           |        | $p^b$  | $p^c$ |
|---------------------------------------------------|-----------|------------------------------|-------------------|-----------------------------------|---------------------------|--------|--------|-------|
|                                                   |           |                              | No<br>$n=2561$    | Possible <sup>a</sup><br>$n=1107$ | By self report<br>$n=496$ |        |        |       |
| Age (years)                                       | 4164      | 61.7 (10.4)                  | 61.5 (10.4)       | 61.9 (10.2)                       | 63.8 (10.2)               | 0.37   | <0.001 |       |
| Sex (men)                                         | 4164      | 2996 (72.0%)                 | 1870 (73.0%)      | 765 (69.1%)                       | 361 (72.8%)               | 0.02   | 0.91   |       |
| Fasting                                           | 1137      | 1137 (27.3%)                 | 657 (25.7%)       | 346 (31.3%)                       | 134 (27.0%)               | <0.001 | 0.53   |       |
| BMI (kg/m <sup>2</sup> )                          | 4161      | 26.8 (3.98)                  | 26.3 (3.65)       | 27.0 (4.09)                       | 28.5 (4.83)               | <0.001 | <0.001 |       |
| Current smoking                                   | 4164      | 1320 (31.7%)                 | 818 (31.9%)       | 369 (33.3%)                       | 133 (26.8%)               | 0.41   | 0.02   |       |
| Hypertension                                      | 4155      | 1937 (46.5%)                 | 1116 (43.6%)      | 481 (43.5%)                       | 340 (68.5%)               | 0.90   | <0.001 |       |
| Systolic BP (mmHg)                                | 4112      | 140 (126–154)                | 139 (125–152)     | 140 (127–155)                     | 143 (130–160)             | 0.07   | <0.001 |       |
| Diastolic BP (mmHg)                               | 4109      | 80 (75–88)                   | 80 (75–88)        | 80 (75–89)                        | 80 (75–88)                | 0.73   | 0.90   |       |
| Significant CAD <sup>d</sup>                      | 4164      | 3118 (74.9%)                 | 1923 (75.1%)      | 774 (69.9%)                       | 421 (84.9%)               | 0.001  | <0.001 |       |
| Renal function and inflammation                   |           |                              |                   |                                   |                           |        |        |       |
| Serum creatinine ( $\mu\text{mol/l}$ )            | 4160      | 89 (81–98)                   | 89 (81–98)        | 88 (80–98)                        | 90 (81–103)               | 0.88   | 0.002  |       |
| eGFR ( $\text{ml min}^{-1} 1.73 \text{ m}^{-2}$ ) | 4155      | 91 (78–99)                   | 91 (79–99)        | 90 (78–99)                        | 90 (74–100)               | 0.23   | 0.002  |       |
| Serum CRP (nmol/l)                                | 4162      | 17.0 (8.29–35.0)             | 16.1 (8.00–32.1)  | 17.7 (8.48–35.9)                  | 20.3 (10.2–46.0)          | 0.33   | <0.001 |       |
| Plasma neopterin (nmol/l)                         | 4130      | 8.18 (6.67–10.4)             | 8.09 (6.63–10.1)  | 8.33 (6.82–10.7)                  | 8.22 (6.57–11.0)          | 0.01   | 0.15   |       |
| Plasma kynurenine (nmol/l)                        | 4155      | 1.68 (1.39–2.01)             | 1.67 (1.38–1.98)  | 1.70 (1.39–2.03)                  | 1.73 (1.41–2.09)          | 0.60   | 0.03   |       |
| Plasma tryptophan ( $\mu\text{mol/l}$ )           | 4155      | 70.2 (60.7–79.7)             | 70.2 (61.3–79.5)  | 70.2 (59.5–79.9)                  | 70.3 (60.0–80.4)          | 0.66   | 0.99   |       |
| Plasma KTR (nmol/ $\mu\text{mol}$ )               | 4155      | 23.8 (19.8–29.0)             | 23.6 (19.7–28.6)  | 24.4 (20.1–29.4)                  | 24.4 (19.9–30.7)          | 0.17   | 0.08   |       |

|                                   |      |                   |                  |                  |                  |        |        |
|-----------------------------------|------|-------------------|------------------|------------------|------------------|--------|--------|
| Serum lipids                      |      |                   |                  |                  |                  |        |        |
| ApoA-1 (g/l)                      | 4162 | 1.30 (1.13–1.48)  | 1.30 (1.14–1.48) | 1.31 (1.13–1.49) | 1.24 (1.07–1.43) | 1.00   | <0.001 |
| ApoB (g/l)                        | 4163 | 0.87 (0.73–1.04)  | 0.87 (0.73–1.05) | 0.86 (0.74–1.05) | 0.84 (0.72–0.98) | 0.99   | 0.04   |
| Triacylglycerol (mmol/l)          | 4160 | 1.50 (1.08–2.14)  | 1.44 (1.06–2.03) | 1.51 (1.08–2.24) | 1.73 (1.21–2.6)  | 0.004  | <0.001 |
| Glucose homeostasis               |      |                   |                  |                  |                  |        |        |
| Plasma glucose (mmol/l)           | 4158 | 5.6 (5.1–6.6)     | 5.4 (5.0–6.1)    | 5.7 (5.1–6.5)    | 10.0 (7.6–12.6)  | <0.001 | <0.001 |
| HbA <sub>1c</sub> (%)             | 4114 | 6.1 (5.4–6.9)     | 5.6 (5.0–6.0)    | 7.0 (6.7–7.5)    | 7.7 (6.7–9.0)    | <0.001 | <0.001 |
| HbA <sub>1c</sub> (mmol/mol)      | 4114 | 43 (36–52)        | 38 (31–42)       | 53 (50–58)       | 61 (50–75)       | –      | –      |
| Serum insulin (pmol/l)            | 1081 | 28.0 (19.7–69.5)  | 22.8 (19.7–56.0) | 23.9 (19.7–70.0) | 76.8 (36.3–144)  | 0.33   | <0.001 |
| Serum C-peptide (nmol/l)          | 1081 | 0.77 (0.55–1.03)  | 0.72 (0.53–0.98) | 0.80 (0.59–1.12) | 0.86 (0.63–1.22) | 0.002  | <0.001 |
| HOMA2 C-peptide                   |      |                   |                  |                  |                  |        |        |
| Beta cell activity                | 1081 | 109 (85–137)      | 113 (93–138)     | 114 (88–141)     | 58 (34–87)       | 0.75   | <0.001 |
| Insulin resistance                | 1081 | 1.8 (1.2–2.4)     | 1.6 (1.2–2.2)    | 1.8 (1.3–2.5)    | 2.2 (1.7–3.4)    | <0.01  | <0.001 |
| Urine biomarkers                  |      |                   |                  |                  |                  |        |        |
| Creatinine (mmol/l)               | 3722 | 11.4 (7.7–16.1)   | 11.7 (7.8–16.5)  | 11.7 (7.8–16.1)  | 9.8 (6.9–13.8)   | 0.86   | <0.001 |
| Albumin:creatinine (mg/mmol)      | 3426 | 0.60 (0.40–1.10)  | 0.50 (0.40–0.90) | 0.60 (0.40–1.10) | 1.20 (0.60–3.90) | <0.001 | <0.001 |
| Kynurenine:creatinine (nmol/mmol) | 3721 | 196 (126–305)     | 183 (118–278)    | 190 (124–299)    | 321 (205–486)    | 0.11   | <0.001 |
| Tryptophan:creatinine (μmol/mmol) | 3721 | 5.05 (3.74–6.71)  | 4.86 (3.68–6.47) | 5.10 (3.74–6.75) | 5.90 (4.24–8.30) | 0.15   | <0.001 |
| FE of kynurenine <sup>c</sup>     | 3718 | 8.77 (5.62–13.41) | 8.27 (5.42–12.2) | 8.41 (5.45–13.1) | 14.0 (9.40–21.5) | 0.41   | <0.001 |
| FE of tryptophan <sup>c</sup>     | 3718 | 5.42 (3.92–7.33)  | 5.28 (3.82–7.08) | 5.50 (3.95–7.33) | 6.22 (4.56–8.74) | 0.10   | <0.001 |
| Urine KTR (nmol/μmol)             | 3721 | 37.9 (28.3–53.6)  | 36.4 (27.7–49.5) | 36.4 (27.2–52.3) | 52.1 (37.5–73.7) | 0.62   | <0.001 |

| Medications                  |      |              |              |             |             |       |        |
|------------------------------|------|--------------|--------------|-------------|-------------|-------|--------|
| Aspirin                      | 4164 | 3400 (81.7%) | 2117 (82.7%) | 866 (78.2%) | 417 (84.1%) | 0.002 | 0.45   |
| Statins                      | 4164 | 3335 (80.1%) | 2051 (80.1%) | 860 (77.7%) | 424 (85.5%) | 0.10  | 0.01   |
| β-blockers                   | 4164 | 3018 (72.5%) | 1858 (72.5%) | 791 (71.5%) | 369 (74.4%) | 0.50  | 0.40   |
| Loop-diuretics               | 4164 | 452 (10.9%)  | 232 (9.1%)   | 122 (11.0%) | 98 (19.8%)  | 0.07  | <0.001 |
| Thiazides                    | 4164 | 289 (6.9%)   | 160 (6.2%)   | 81 (7.3%)   | 48 (9.7%)   | 0.23  | 0.01   |
| ACE-inhibitor and/or ARB     | 4164 | 1330 (61.5%) | 733 (28.6%)  | 327 (29.5%) | 270 (54.4%) | 0.57  | <0.001 |
| Insulin                      | 4164 | 142 (3.4%)   | –            | –           | 142 (28.6%) | –     | –      |
| Sulfonylurea                 | 4164 | 169 (4.1%)   | –            | –           | 169 (34.1%) | –     | –      |
| Metformin                    | 4164 | 193 (4.6%)   | –            | –           | 193 (38.9%) | –     | –      |
| Other glucose-lowering drugs | 4164 | 15 (0.4%)    | –            | –           | 15 (3.0%)   | –     | –      |

Data are presented as *n* (%), mean (SD), or median (IQR)

<sup>a</sup>Single baseline measurement of HbA<sub>1c</sub> ≥6.5% (≥48 mmol/mol) or fasting glucose ≥7.0 mmol/l or non-fasting glucose ≥11.1 mmol/l

<sup>b</sup>*p* No vs Possible (Games-Howell ANOVA post-hoc test and  $\chi^2$  test)

<sup>c</sup>*p* No vs By self report (Games-Howell ANOVA post-hoc test and  $\chi^2$  test)

<sup>d</sup>At least one stenosis with ≥50 % luminal narrowing in a main coronary artery or its major side branches, identified by coronary angiography

<sup>e</sup>FE=( $[\text{kynurenine}]_{\text{urine}} \times [\text{creatinine}]_{\text{plasma}}$ )/( $[\text{kynurenine}]_{\text{plasma}} \times [\text{creatinine}]_{\text{urine}}$ )

ARB, Angiotensin II receptor blocker

**ESM Table 2** HRs (95% CIs) for incident type 2 diabetes mellitus by KTR in plasma and urine using multiple imputation<sup>a</sup> (*n*=2519)

|                                | Per SD increase   |          | Q4 vs Q1          |          |
|--------------------------------|-------------------|----------|-------------------|----------|
|                                | HR (95% CI)       | <i>p</i> | HR (95% CI)       | <i>p</i> |
| Plasma (log <sub>e</sub> ) KTR |                   |          |                   |          |
| Model 1 <sup>b</sup>           | 1.14 (1.11, 1.16) | 0.11     | 1.27 (0.81, 2.01) | 0.31     |
| Model 2 <sup>c</sup>           | 0.98 (0.81, 1.19) | 0.86     | 0.85 (0.50, 1.43) | 0.54     |
| Urine (log <sub>e</sub> ) KTR  |                   |          |                   |          |
| Model 1 <sup>b</sup>           | 1.42 (1.22, 1.65) | <0.001   | 2.37 (1.40, 4.04) | 0.002    |
| Model 2 <sup>c</sup>           | 1.36 (1.15, 1.60) | <0.001   | 2.17 (1.27, 3.71) | 0.005    |

<sup>a</sup>Pooled HRs (95% CIs) from multiple imputation, using the fully conditional specification method (iterative Markov chain Monte Carlo). The imputation model includes plasma KTR, urine KTR, the outcome variable (dichotomous), the cumulative hazard rate (Nelson-Aalen estimator), and all the covariates specified in footnote <sup>c</sup>.

<sup>b</sup>Adjusted for age and sex

<sup>c</sup>Adjusted for age, sex, BMI, eGFR, CRP, HbA<sub>1c</sub>, serum triacylglycerol, ApoA-1, urine albumin:creatinine ratio, use of loop diuretics, ACE inhibitors or angiotensin II receptor blockers, statins and β-blockers

**ESM Table 3** HRs (95% CIs) for incident type 2 diabetes mellitus by urine KTR<sup>a</sup> adjusted for parameters of glucose homeostasis ( $n=607$ )

|                                | Per SD increase of urine ( $\log_e$ ) KTR |          |
|--------------------------------|-------------------------------------------|----------|
|                                | HR (95% CI)                               | <i>p</i> |
| Model <sup>b</sup>             | 1.99 (1.34, 2.96)                         | <0.001   |
| Model <sup>b</sup> + HOMA-B    | 1.69 (1.08, 2.64)                         | 0.02     |
| Model <sup>b</sup> + HOMA-IR   | 1.52 (0.99, 2.33)                         | 0.05     |
| Model <sup>b</sup> + insulin   | 1.63 (1.06, 2.50)                         | 0.03     |
| Model <sup>b</sup> + C-peptide | 1.53 (1.00, 2.35)                         | 0.05     |

<sup>a</sup>SD: 0.47 nmol/ $\mu$ mol

<sup>b</sup>Adjusted for age and sex

**ESM Table 4** HRs (95% CIs) for incident type 2 diabetes mellitus by urine kynurenine:creatinine<sup>a</sup> and FE of kynurenine<sup>b</sup> (n=2263)

|                                                   | Per SD increase   |          | Q4 vs Q1          |          |
|---------------------------------------------------|-------------------|----------|-------------------|----------|
|                                                   | HR (95% CI)       | <i>p</i> | HR (95% CI)       | <i>p</i> |
| Urine (log <sub>e</sub> ) kynurenine:creatinine   |                   |          |                   |          |
| Model 1 <sup>c</sup>                              | 1.32 (1.12,1.55)  | <0.001   | 1.95 (1.18, 3.24) | 0.009    |
| Model 2 <sup>d</sup>                              | 1.32 (1.11, 1.56) | 0.002    | 1.99 (1.16, 3.44) | 0.01     |
| (log <sub>e</sub> ) FE of kynurenine <sup>e</sup> |                   |          |                   |          |
| Model 1 <sup>c</sup>                              | 1.19 (1.01, 1.40) | 0.04     | 1.57 (0.96, 2.57) | 0.07     |
| Model 2 <sup>d</sup>                              | 1.25 (1.05, 1.49) | 0.01     | 1.67 (1.00, 2.79) | 0.05     |

<sup>a</sup>SD: 0.63 nmol/mmol<sup>b</sup>SD: 0.63<sup>c</sup>Adjusted for age and sex<sup>d</sup>Adjusted for age, sex, BMI, eGFR, CRP, HbA<sub>1c</sub>, serum triacylglycerol, ApoA-1, urine albumin:creatinine ratio, use of loop diuretics, ACE inhibitors or angiotensin II receptor blockers, statins and β-blockers<sup>e</sup>FE=( $[\text{kynurenine}]_{\text{urine}} \times [\text{creatinine}]_{\text{plasma}}$ )/( $[\text{kynurenine}]_{\text{plasma}} \times [\text{creatinine}]_{\text{urine}}$ )

**ESM Table 5** HRs (95% CIs) for incident type 2 diabetes mellitus by urine tryptophan:creatinine<sup>a</sup> and FE of tryptophan<sup>b</sup> (*n*=2260)

|                                                   | Per SD increase   |          | Q4 vs Q1          |          |
|---------------------------------------------------|-------------------|----------|-------------------|----------|
|                                                   | HR (95% CI)       | <i>p</i> | HR (95% CI)       | <i>p</i> |
| Urine (log <sub>e</sub> ) tryptophan:creatinine   |                   |          |                   |          |
| Model 1 <sup>c</sup>                              | 1.05 (0.89, 1.23) | 0.59     | 1.06 (0.68, 1.68) | 0.79     |
| Model 2 <sup>d</sup>                              | 1.06 (0.89, 1.27) | 0.49     | 1.07 (0.64, 1.78) | 0.80     |
| (log <sub>e</sub> ) FE of tryptophan <sup>e</sup> |                   |          |                   |          |
| Model 1 <sup>c</sup>                              | 0.95 (0.80, 1.13) | 0.55     | 1.03 (0.64, 1.63) | 0.92     |
| Model 2 <sup>d</sup>                              | 0.97 (0.81, 1.16) | 0.74     | 1.00 (0.61, 1.63) | 0.99     |

<sup>a</sup>SD: 0.44 nmol/mmol<sup>b</sup>SD: 0.48<sup>c</sup>Adjusted for age and sex<sup>d</sup>Adjusted for age, sex, BMI, eGFR, CRP, HbA<sub>1c</sub>, serum triacylglycerol, ApoA-1, urine albumin:creatinine ratio, use of loop diuretics, ACE inhibitors or angiotensin II receptor blockers, statins and β-blockers<sup>e</sup>FE=([tryptophan]<sub>urine</sub>×[creatinine]<sub>plasma</sub>)/([ tryptophan]<sub>plasma</sub>×[creatinine]<sub>urine</sub>)

**ESM Table 6** Model fit, reclassification, and discrimination analyses for urine KTR<sup>a</sup> in relation to incident type 2 diabetes mellitus ( $n=2263$ )

|                                                | Incident type 2 diabetes |          |                   |          |             |          |
|------------------------------------------------|--------------------------|----------|-------------------|----------|-------------|----------|
|                                                | AIC                      | <i>p</i> | NRI (95% CI)      | <i>p</i> | C-statistic | <i>p</i> |
| Model <sup>b</sup> without biomarker           | 994                      |          |                   |          | 0.731       |          |
| Model <sup>b</sup> with urine ( $\log_e$ ) KTR | 988                      | <0.001   | 0.21 (0.04, 0.38) | 0.02     | 0.751       | 0.04     |

<sup>a</sup>SD: 0.47 nmol/ $\mu$ mol

<sup>b</sup>Adjusted for age, sex, BMI, eGFR, CRP, HbA<sub>1c</sub>, serum triacylglycerol, ApoA-1, urine albumin:creatinine ratio, use of loop diuretics, ACE inhibitors or angiotensin II receptor blockers, statins and  $\beta$ -blockers



**ESM Figure 1**

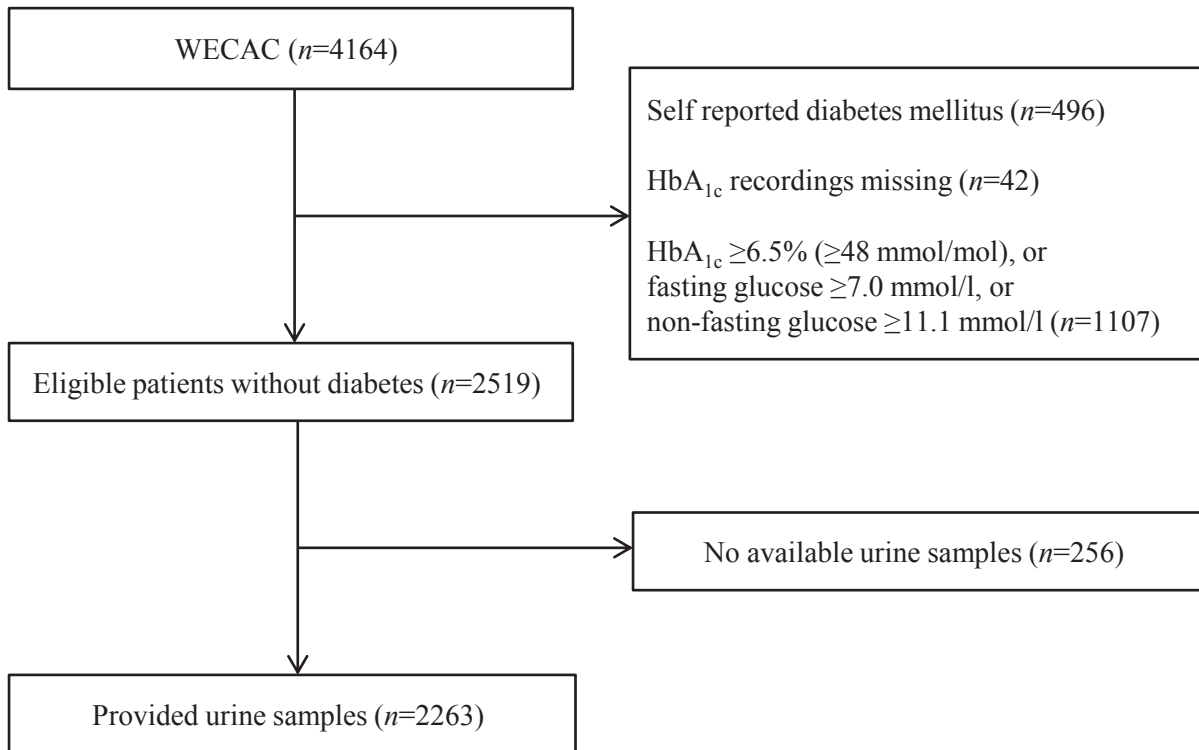

WECAC, Western Norway Coronary Angiography Cohort
